# Supplementary material
Source: Springer Nature journal article supplement (https://www.springermedizin.de/resource/supplementary/12960_2013_348_MOESM1_ESM.pdf/9569894)

### Chief Nursing Officers (n=39 responses)

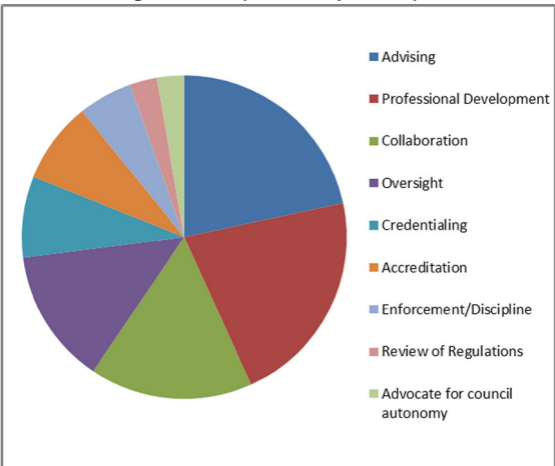

### Professional Associations (n=23 responses)

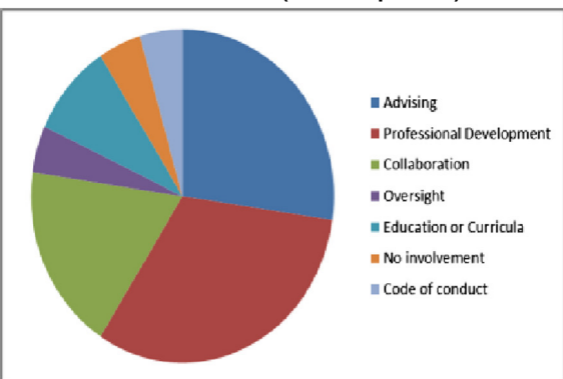

### Academicians (n=15 responses)

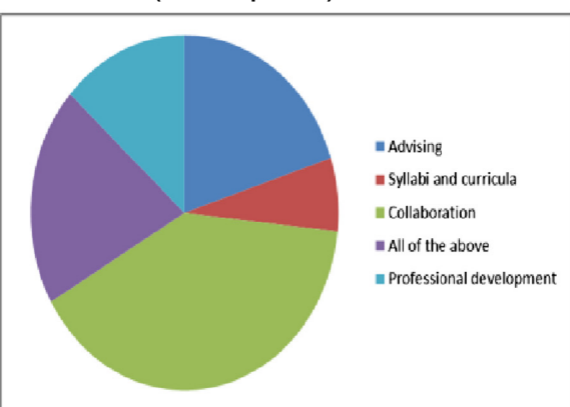

Supplement: MOESM1 [file 9569894]
